# Supplementary material
Source: MDPI journal article supplement (https://www.mdpi.com/2073-4395/11/3/546)
Supplement: s1 [file s1]

Archive with 5 entries (5 files):
- Figure S1.jpg
- Figure S2.jpg
- Figure S3.jpg
- Figure S4.jpg
- Table S1.pdf
