# Supplementary material
Source: MDPI journal article supplement (https://www.mdpi.com/2073-4395/11/3/546)
Supplement: s1 [file s1 › Table S1.pdf]

**Table S1.** Main structures found in the study.

| <b>Planktonic</b>                   |                             | <b>Biofilm in dry condition</b> |                                       | <b>Biofilm</b>               |
|-------------------------------------|-----------------------------|---------------------------------|---------------------------------------|------------------------------|
| <b>Early stage</b>                  | <b>Later stage</b>          | <b>Early stage</b>              | <b>Mature</b>                         | <b>Mature</b>                |
| Solitaire and single cellular lines | Solitaire and aligned cells | Aligned cells                   | Abundant and thicker bacterial lines  | Medium bacterial aggregation |
|                                     | Profuse clusters            | Honeycomb structure             | Dense bacterial aggregation           | Honeycomb structure          |
| Small bacterial aggregates          | Medium EPS-like matrix      | Clumped cells                   | Cellular multilayers                  | Medium EPS-like matrix       |
| Slight EPS-like matrix              |                             | Medium EPS-like matrix          | Clumped cells                         | Bacterial lines              |
|                                     |                             |                                 | Denser and longer honeycomb structure |                              |
|                                     |                             |                                 | Abundant EPS-like matrix              |                              |

Different sizes of putative vesicles, circular and grouped membranes and putative phages were found throughout the study
