# Supplementary material
Source: MDPI journal article supplement (https://www.mdpi.com/2073-4395/11/3/546)

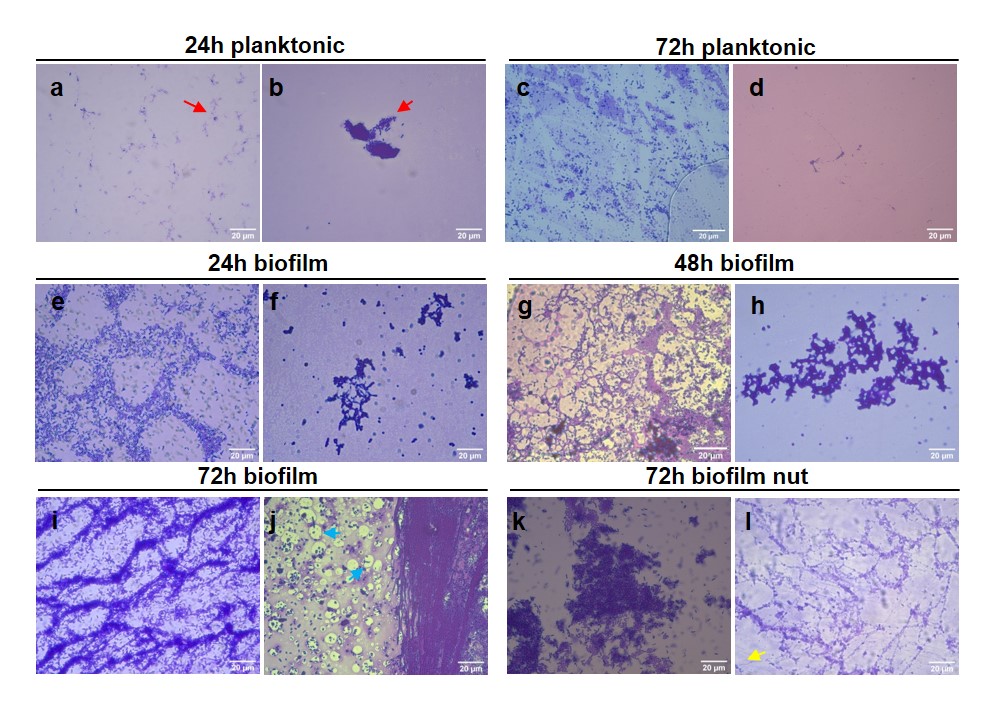

Supplement: s1 [file s1 › Figure S1.jpg]

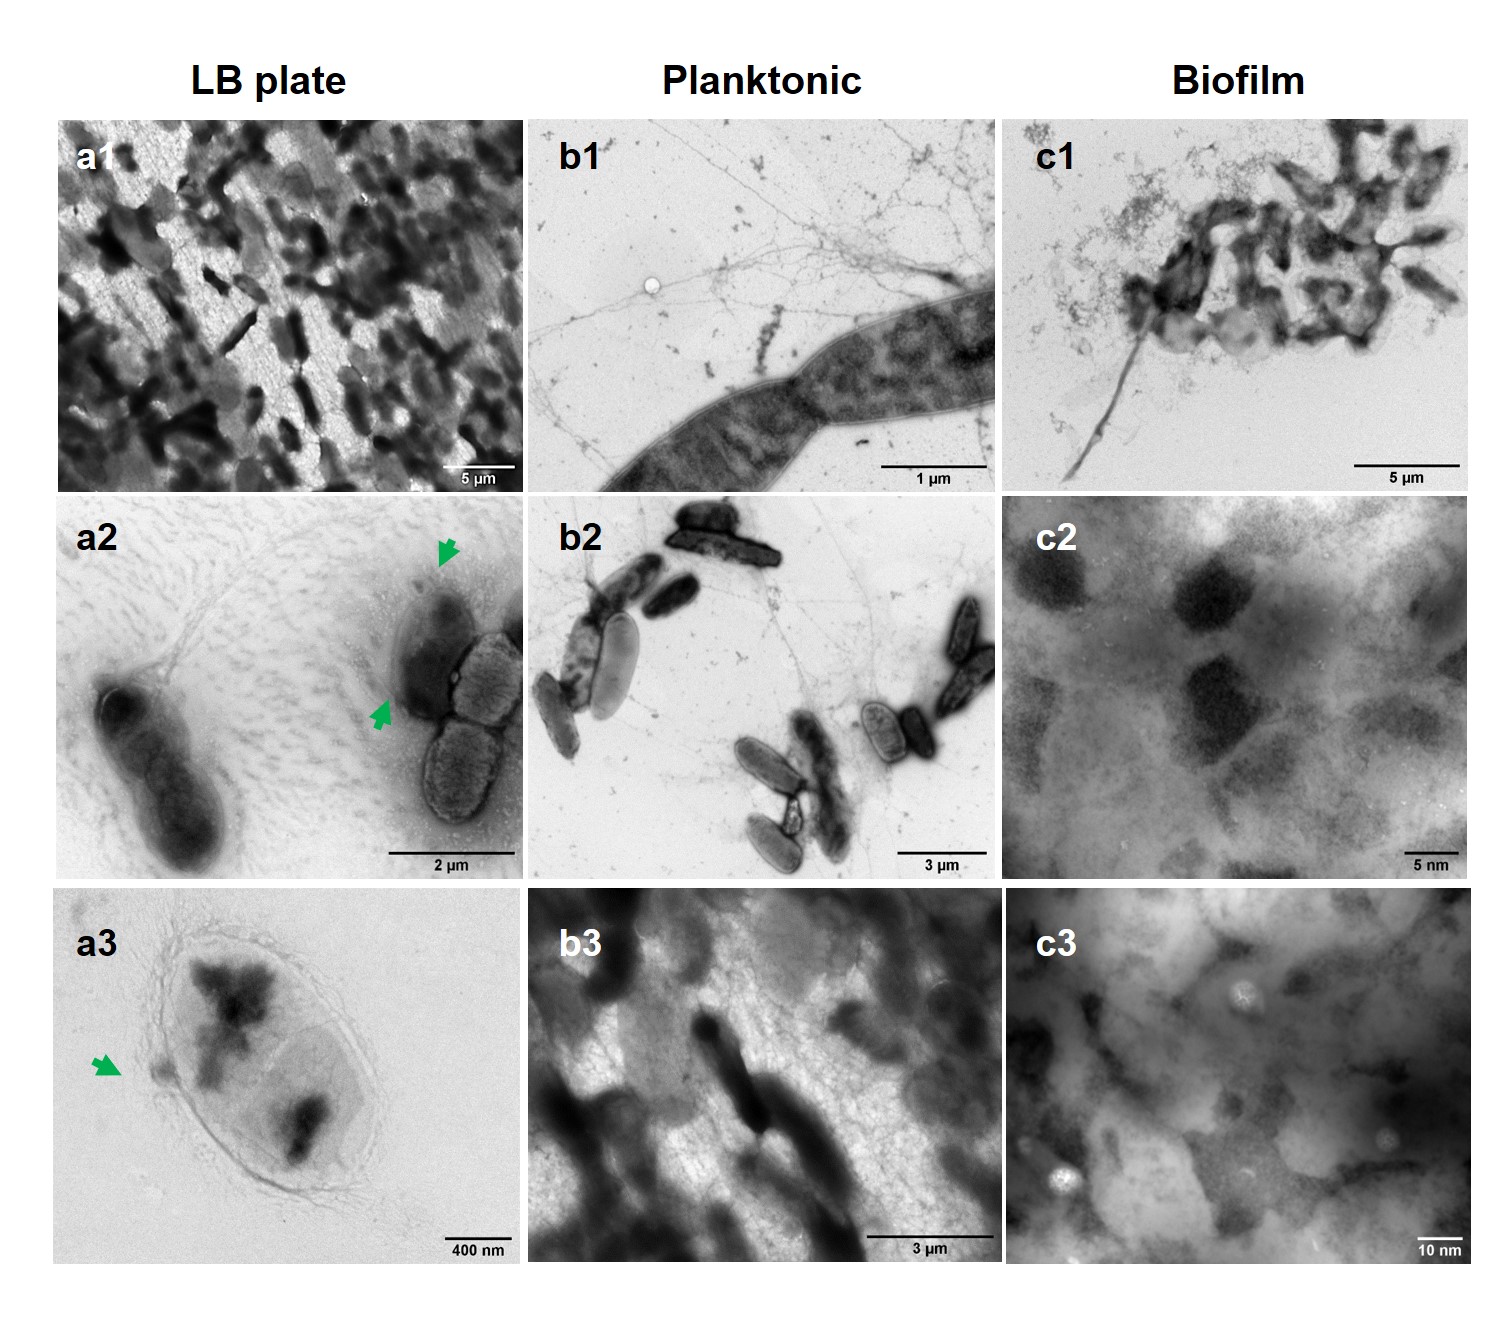

Supplement: s1 [file s1 › Figure S2.jpg]

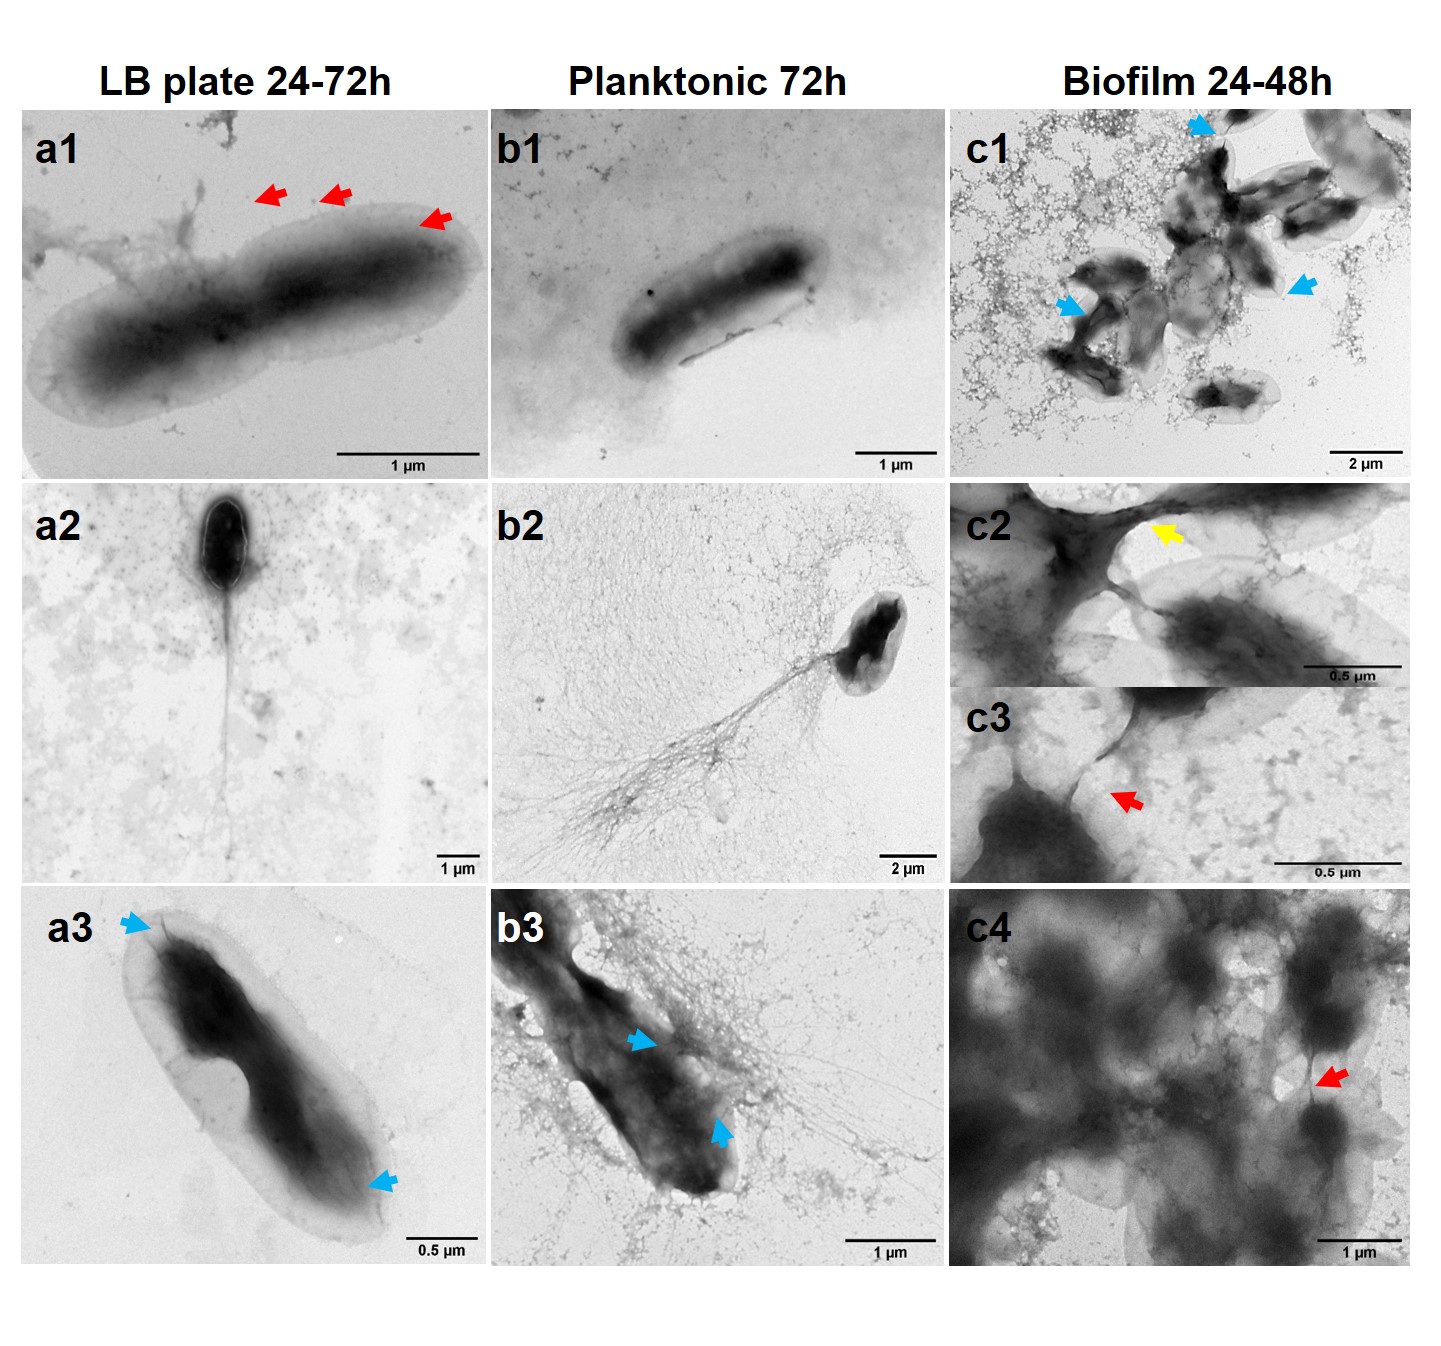

Supplement: s1 [file s1 › Figure S3.jpg]

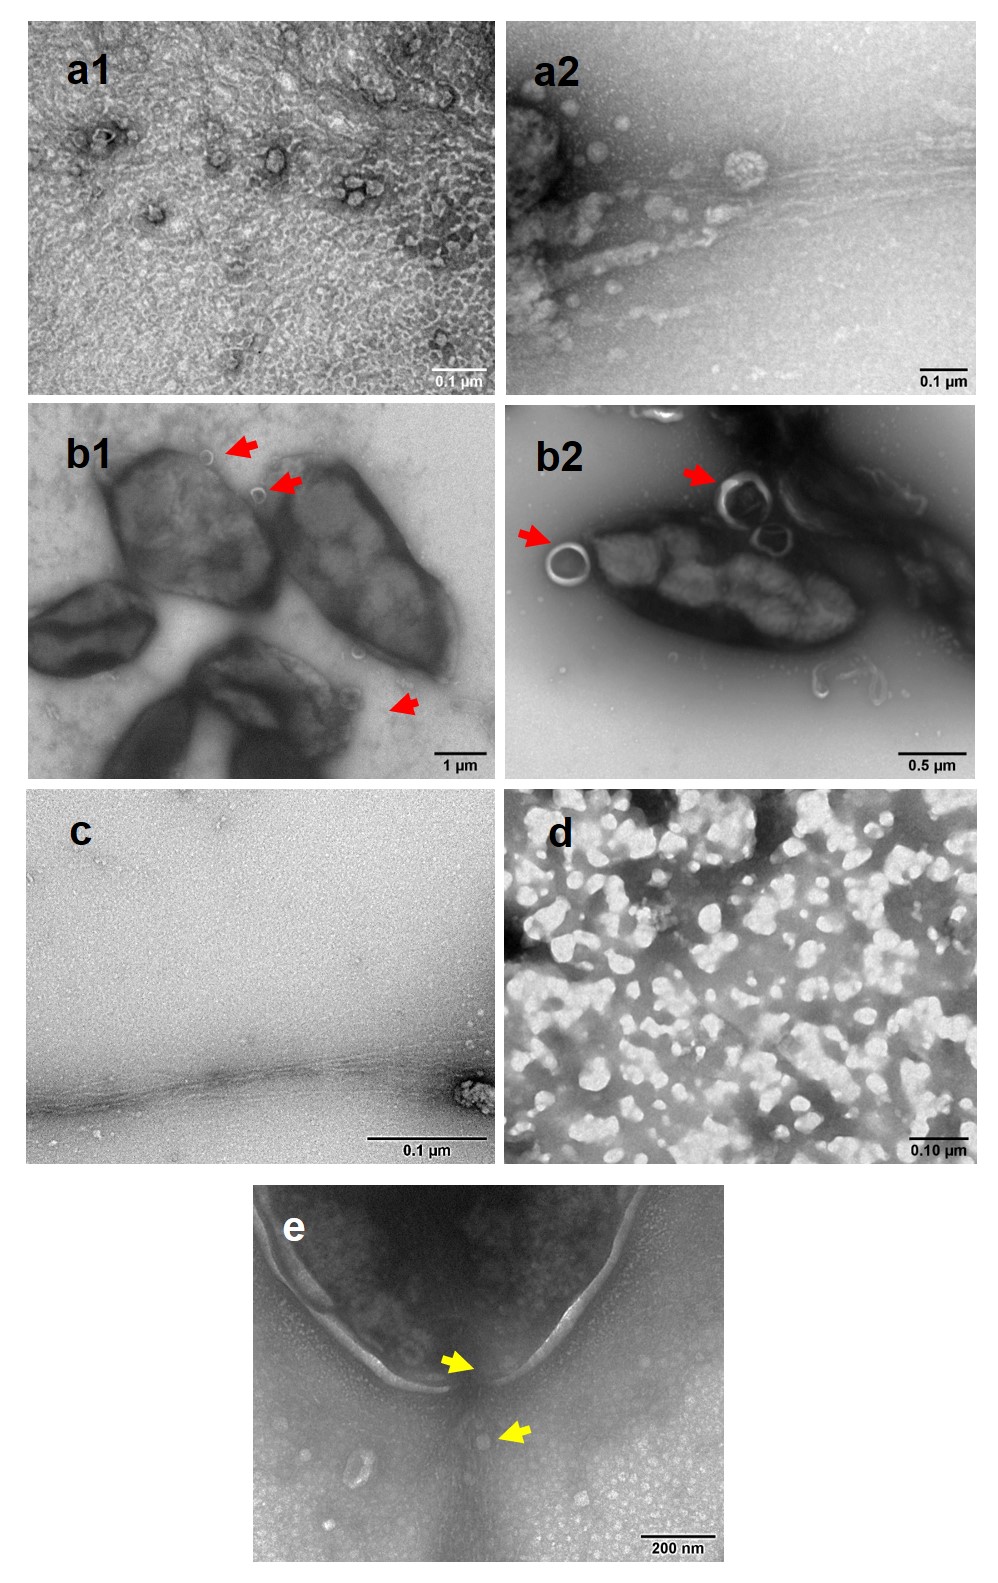

Supplement: s1 [file s1 › Figure S4.jpg]
